# Supplementary material for: Measurement of adherence in a randomised controlled trial of a complex intervention: supported self-management for adults with learning disability and type 2 diabetes
Source: PubMed Central journal article supplement (PMC5052902; doi:10.1186/s12874-016-0236-x), 2016-10-06
Supplement: 12874_2016_236_MOESM5_ESM.pdf [file 12874_2016_236_MOESM5_ESM.pdf]

|                 |                      |               |                          |                            |                           |            |                      |
|-----------------|----------------------|---------------|--------------------------|----------------------------|---------------------------|------------|----------------------|
| Person Initials | <input type="text"/> | Date of Birth | Day <input type="text"/> | Month <input type="text"/> | Year <input type="text"/> | Phase I ID | <input type="text"/> |
|-----------------|----------------------|---------------|--------------------------|----------------------------|---------------------------|------------|----------------------|

**To be completed by the Study Nurse delivering the Self-Management Intervention**  
*(Only to be completed for sessions involving some elements of intervention delivery, not those which are purely administrative – e.g. arranging appointments.)*

### Section A – Session Attendance

Planned date of session  Day  Month  Year  **or tick if**  No sessions could be arranged (Please complete Section D)

Did this go ahead?  Yes → Please skip to Section B

No → Was another session arranged?  Yes → New date  Day  Month  Year  (No further details required for this session)

No, did not want any further sessions → Please complete Sections C & D

### Section B – Session Details

Length of session  Hours  Minutes

Session number

Location of session  Person's home  Other location, please specify

GP practice  Day centre

Who was present? (Please tick yes/no/N/A for each)

Person with diabetes (study participant)  Yes  No

Consenting Supporter  Yes  No  N/A – No consenting supporter

Other person/people  Yes  No

**If yes, who?**  
*(Include details of who each person was and their role in relation to the person with diabetes)*

What was the main focus of this session? (Tick all that apply)

Getting started  Mapping support  
 Setting goals  Checking progress

Did you refer them for a personal budget assessment?  Yes  No  Already had

**Session 1 only:** Did you give them the standard leaflet?  Yes  No

Was this the last session?  Yes → Please complete Sections C & D  
 No → No further details required – Please sign & date this form and return to CTRU

Completed by  Date  Day  Month  Year  Form continues on next page ▶▶

*Prior to returning this form to CTRU you must make a copy of the form and any amendments for retention at site. CTRU, University of Leeds (please see Investigator Site File for full contact details).*

|                     |              |          |                  |          |
|---------------------|--------------|----------|------------------|----------|
| For office use only | Computerised |          | Verified/Checked |          |
|                     | Date         | Initials | Date             | Initials |

|                 |  |               |     |       |      |            |  |
|-----------------|--|---------------|-----|-------|------|------------|--|
| Person Initials |  | Date of Birth | Day | Month | Year | Phase I ID |  |
|-----------------|--|---------------|-----|-------|------|------------|--|

### Section C – Engagement

To be completed after the last session

In your opinion:

- 1) How engaged was the person within the sessions?
  - Very engaged
  - Quite engaged
  - Not engaged – attention was not focussed
  
- 2) How engaged was the person with the materials?
  - Very engaged
  - Quite engaged
  - Not engaged – hardly used materials
  
- 3) How engaged was the consenting supporter with the sessions?
  - Very engaged
  - Quite engaged
  - Not engaged – attention was not focussed
  - Did not attend at all
  - N/A – no consenting Supporter

- 4) Was there anyone else who was engaged in the intervention implementation?
  - Yes → Who?
  - No

Did you collect any materials at the last session?
 

- Yes → Please return these to CTRU via your supervisor
- No

### Section D – Summary of Attendance

Please tick one of the following to describe the participant's attendance:

- Did not attend **any** sessions → Reason
- Did not attend **all** required sessions → Reason
- Completed all required sessions

Were more than 4 sessions attended?
 

- Yes → Reason
- No

Completed by  Date  Last Page ■

*Prior to returning this form to CTRU you must make a copy of the form and any amendments for retention at site. CTRU, University of Leeds (please see Investigator Site File for full contact details).*

|                     |                             |                             |
|---------------------|-----------------------------|-----------------------------|
| For office use only | <i>Computerised</i>         | <i>Verified/Checked</i>     |
|                     | <i>Date</i> <i>Initials</i> | <i>Date</i> <i>Initials</i> |

|                 |  |               |     |       |      |            |  |
|-----------------|--|---------------|-----|-------|------|------------|--|
| Person Initials |  | Date of Birth | Day | Month | Year | Phase I ID |  |
|-----------------|--|---------------|-----|-------|------|------------|--|

**To be completed by the independent reviewer from therapist notes and copies of completed charts**

**Section A – Session Details**

Session date 

|     |       |      |
|-----|-------|------|
| Day | Month | Year |
|     |       |      |

 Session number 

|  |  |
|--|--|
|  |  |
|--|--|

Nurse delivering intervention

What was covered during this session? (Tick yes or no for each and give details as appropriate)

|                                   |                              | Yes                      | No                                                                                                                                                                                                                                                                                                                                                                                                                                                                                                       |  |      |             |  |  |      |             |  |  |
|-----------------------------------|------------------------------|--------------------------|----------------------------------------------------------------------------------------------------------------------------------------------------------------------------------------------------------------------------------------------------------------------------------------------------------------------------------------------------------------------------------------------------------------------------------------------------------------------------------------------------------|--|------|-------------|--|--|------|-------------|--|--|
| Getting Started                   | 1) My week timetable         | <input type="checkbox"/> | <input type="checkbox"/>                                                                                                                                                                                                                                                                                                                                                                                                                                                                                 |  |      |             |  |  |      |             |  |  |
|                                   | 2) My life chart             | <input type="checkbox"/> | <input type="checkbox"/>                                                                                                                                                                                                                                                                                                                                                                                                                                                                                 |  |      |             |  |  |      |             |  |  |
|                                   | 3) Looking after my diabetes | <input type="checkbox"/> | <input type="checkbox"/>                                                                                                                                                                                                                                                                                                                                                                                                                                                                                 |  |      |             |  |  |      |             |  |  |
|                                   | 4) 'I am going to' chart*    | <input type="checkbox"/> | <input type="checkbox"/>                                                                                                                                                                                                                                                                                                                                                                                                                                                                                 |  |      |             |  |  |      |             |  |  |
|                                   | 5) 'What where when' chart   | <input type="checkbox"/> | <input type="checkbox"/>                                                                                                                                                                                                                                                                                                                                                                                                                                                                                 |  |      |             |  |  |      |             |  |  |
| 6) Supporters & helpers checklist | <input type="checkbox"/>     | <input type="checkbox"/> | <i>Nurse will have taken a photograph of these. Obtain from nurse records.</i>                                                                                                                                                                                                                                                                                                                                                                                                                           |  |      |             |  |  |      |             |  |  |
| 7) 'I am going to' box*           | <input type="checkbox"/>     | <input type="checkbox"/> | <b>If yes, what was/were the identified goal(s)?</b><br>Choose a code from list below and specify if = 11 (Other):<br>Goal 1 <table border="1" style="display: inline-table; border-collapse: collapse;"><tr><td style="width: 30px;">Code</td><td>Description</td></tr><tr><td> </td><td> </td></tr></table><br>Goal 2 <table border="1" style="display: inline-table; border-collapse: collapse;"><tr><td style="width: 30px;">Code</td><td>Description</td></tr><tr><td> </td><td> </td></tr></table> |  | Code | Description |  |  | Code | Description |  |  |
| Code                              | Description                  |                          |                                                                                                                                                                                                                                                                                                                                                                                                                                                                                                          |  |      |             |  |  |      |             |  |  |
|                                   |                              |                          |                                                                                                                                                                                                                                                                                                                                                                                                                                                                                                          |  |      |             |  |  |      |             |  |  |
| Code                              | Description                  |                          |                                                                                                                                                                                                                                                                                                                                                                                                                                                                                                          |  |      |             |  |  |      |             |  |  |
|                                   |                              |                          |                                                                                                                                                                                                                                                                                                                                                                                                                                                                                                          |  |      |             |  |  |      |             |  |  |
| <b>OR</b>                         |                              |                          |                                                                                                                                                                                                                                                                                                                                                                                                                                                                                                          |  |      |             |  |  |      |             |  |  |
| 8) 'I am going to' plan*          | <input type="checkbox"/>     | <input type="checkbox"/> | <b>If yes, what were the identified plans?</b><br>Plan 1 <table border="1" style="display: inline-table; border-collapse: collapse;"><tr><td> </td></tr></table><br>Plan 2 <table border="1" style="display: inline-table; border-collapse: collapse;"><tr><td> </td></tr></table>                                                                                                                                                                                                                       |  |      |             |  |  |      |             |  |  |
|                                   |                              |                          |                                                                                                                                                                                                                                                                                                                                                                                                                                                                                                          |  |      |             |  |  |      |             |  |  |
|                                   |                              |                          |                                                                                                                                                                                                                                                                                                                                                                                                                                                                                                          |  |      |             |  |  |      |             |  |  |
| 9) Supporter flashcard(s) given?* | <input type="checkbox"/>     | <input type="checkbox"/> | <b>If yes, how many?</b> <input type="checkbox"/> 1 <input type="checkbox"/> 2 <input type="checkbox"/> 3 <input type="checkbox"/> 4<br>Were they: <input type="checkbox"/> Left with the person to give to the supporter/helper<br><input type="checkbox"/> Given to the supporter/helper in person<br><input type="checkbox"/> Posted to the supporter/helper                                                                                                                                          |  |      |             |  |  |      |             |  |  |

**Goal code list**

|                                |                            |                       |
|--------------------------------|----------------------------|-----------------------|
| 1 = More fruit                 | 5 = Weight loss            | 9 = Retinal screening |
| 2 = More vegetables            | 6 = More physical activity | 10 = Seeing dentist   |
| 3 = Snack swaps (food)         | 7 = Tablet taking          | 11 = Other (specify)  |
| 4 = Snack swaps (fizzy drinks) | 8 = Checking feet          |                       |

\*May stay with participant, so nurse will have taken a photograph. Obtain from nurse records.

**Section B – Final Nurse Visit Only (4 weeks after end of intervention delivery)**

Calendar sheets collected?  Yes → How many? 

|  |  |
|--|--|
|  |  |
|--|--|

  
 No

**Section C – 6 Month Researcher Visit Only**

Calendar sheets collected?  Yes → How many? 

|  |  |
|--|--|
|  |  |
|--|--|

  
 No

Completed by 

|  |
|--|
|  |
|--|

 Date 

|     |       |      |
|-----|-------|------|
| Day | Month | Year |
|     |       |      |

Last Page ■

*Prior to returning this form to CTRU you must make a copy of the form and any amendments for retention at site. CTRU, University of Leeds (please see Investigator Site File for full contact details).*

|                     |              |                  |
|---------------------|--------------|------------------|
| For office use only | Computerised | Verified/Checked |
| Date                | Initials     | Date<br>Initials |

|                 |  |               |     |       |      |            |  |
|-----------------|--|---------------|-----|-------|------|------------|--|
| Person Initials |  | Date of Birth | Day | Month | Year | Phase I ID |  |
|-----------------|--|---------------|-----|-------|------|------------|--|

**To be completed by the independent reviewer once all relevant materials received**

### Fidelity Scoring – 4 Weeks Post-Randomisation

|                                                                           | Yes                      | No                       |                          |             |
|---------------------------------------------------------------------------|--------------------------|--------------------------|--------------------------|-------------|
| 1. Completed 'My Week Timetable' and 'My Life Chart'                      | <input type="checkbox"/> | <input type="checkbox"/> |                          |             |
| 2. Completed 'Looking after my Diabetes Chart'                            | <input type="checkbox"/> | <input type="checkbox"/> |                          |             |
| 3. Completed 'I am Going to Chart' and a 'What Where When Chart'          | <input type="checkbox"/> | <input type="checkbox"/> |                          |             |
| 4. Has an 'I am Going to Box' and/or an 'I am Going to Plan'              | <input type="checkbox"/> | <input type="checkbox"/> |                          |             |
| 5. Completed 'Supporters & Helpers Checklist'                             | <input type="checkbox"/> | <input type="checkbox"/> |                          |             |
| 6. A flashcard was provided for identified supporter and relevant helpers | <input type="checkbox"/> | <input type="checkbox"/> | <b>Any</b>               | <b>None</b> |
| 7. Number of <i>unmarked</i> calendar sheets returned                     | <input type="text"/>     | <input type="checkbox"/> | <input type="checkbox"/> |             |
| 8. Number of <i>marked</i> calendar sheets returned                       | <input type="text"/>     | <input type="checkbox"/> | <input type="checkbox"/> |             |
| 9. The whole process was completed at least once                          | <input type="checkbox"/> | <input type="checkbox"/> |                          |             |
| 10. Evidence of repetition of process for further goals                   | <input type="checkbox"/> | <input type="checkbox"/> |                          |             |

### Fidelity Scoring – 6 Months Post-Randomisation

|                                                       |                      | Any                      | None                     |
|-------------------------------------------------------|----------------------|--------------------------|--------------------------|
| 1. Number of <i>unmarked</i> calendar sheets returned | <input type="text"/> | <input type="checkbox"/> | <input type="checkbox"/> |
| 2. Number of <i>marked</i> calendar sheets returned   | <input type="text"/> | <input type="checkbox"/> | <input type="checkbox"/> |

### Comments and Notes

*Note the dates between which calendar cards could have been completed*

|              |                      |      |     |       |      |             |
|--------------|----------------------|------|-----|-------|------|-------------|
| Completed by | <input type="text"/> | Date | Day | Month | Year | Last Page ■ |
|--------------|----------------------|------|-----|-------|------|-------------|

*Prior to returning this form to CTRU you must make a copy of the form and any amendments for retention at site. CTRU, University of Leeds (please see Investigator Site File for full contact details).*

|                     |                     |          |                         |          |
|---------------------|---------------------|----------|-------------------------|----------|
| For office use only | <i>Computerised</i> |          | <i>Verified/Checked</i> |          |
|                     | Date                | Initials | Date                    | Initials |

**To be completed by the Supervisor following supervision session with study nurse(s)**

Name of supervisor

Name of nurse(s) in supervision session

Date of supervision session 

|     |       |      |
|-----|-------|------|
| Day | Month | Year |
|     |       |      |

Duration of supervision session 

|       |         |
|-------|---------|
| Hours | Minutes |
|       |         |

Method of supervision  Face to face  
 Telephone  
 Email

| Participants discussed | Phase I ID | Initials | Date of birth      |
|------------------------|------------|----------|--------------------|
|                        |            |          | Day Month Year<br> |
|                        |            |          | Day Month Year<br> |
|                        |            |          | Day Month Year<br> |
|                        |            |          | Day Month Year<br> |
|                        |            |          | Day Month Year<br> |
|                        |            |          | Day Month Year<br> |
|                        |            |          | Day Month Year<br> |
|                        |            |          | Day Month Year<br> |

Completed by  Date 

|     |       |      |
|-----|-------|------|
| Day | Month | Year |
|     |       |      |

Last Page ■

*Prior to returning this form to CTRU you must make a copy of the form and any amendments for retention at site. CTRU, University of Leeds (please see Investigator Site File for full contact details).*

|                            |                     |                             |
|----------------------------|---------------------|-----------------------------|
| <i>For office use only</i> | <i>Computerised</i> | <i>Verified/Checked</i>     |
| <i>Date</i>                | <i>Initials</i>     | <i>Date</i> <i>Initials</i> |
